# Supplementary material for: Metabolites can regulate stem cell behavior through the STAT3/AKT pathway in a similar trend to that under hypoxic conditions
Source: PubMed Central journal article supplement (PMC6468014; doi:10.1038/s41598-019-42669-x), 2019-04-16

**(Supplementary information)**

**Metabolites can regulate stem cell behavior through  
the STAT3 / AKT pathway in a similar trend to that  
under hypoxic conditions**

Gun-Jae Jeong<sup>‡</sup>, Donglim Kang<sup>‡</sup>, Ae-Kyeong Kim, Kyu-Hyun Han, Hye Ran Jeon, Dong-ik Kim<sup>\*</sup>.

Division of Vascular Surgery, Samsung Medical Center, Sungkyunkwan University School of  
Medicine, Republic of Korea

<sup>‡</sup> Authors whom contributed equally this work.

**\*Author to whom the correspondence should be addressed:**

Dong-ik Kim, M.D., Ph.D. Division of Vascular Surgery, Samsung Medical Center, 81  
Irwonro, Gangnam-gu, Seoul 06351, Republic of Korea. TEL: +82-2-3410-3467, FAX: +82-

2-

3410-0040,

E-mail: dikim@skku.edu (D.-I. Kim).

**Supplementary Figure 1.** Original developed image for western blot analysis. (A) For figure 1. B and (B), (C) for figure 1. D.

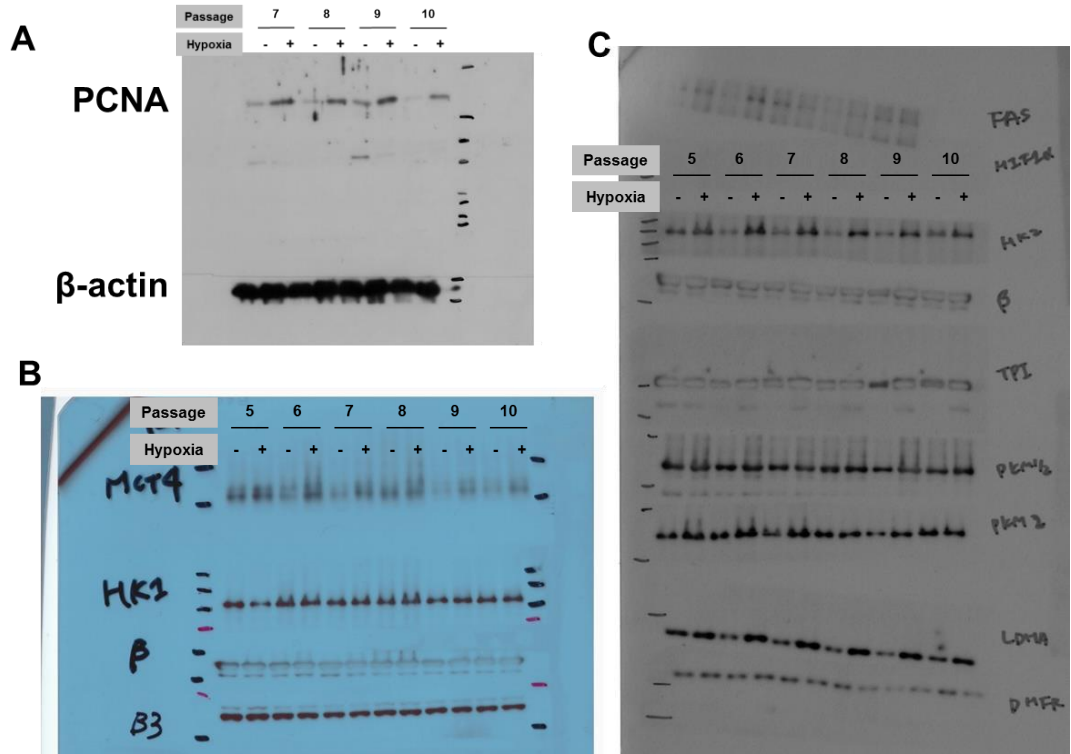



Supplementary Figure 3. Original developed image for western blot analysis for Figure 5.

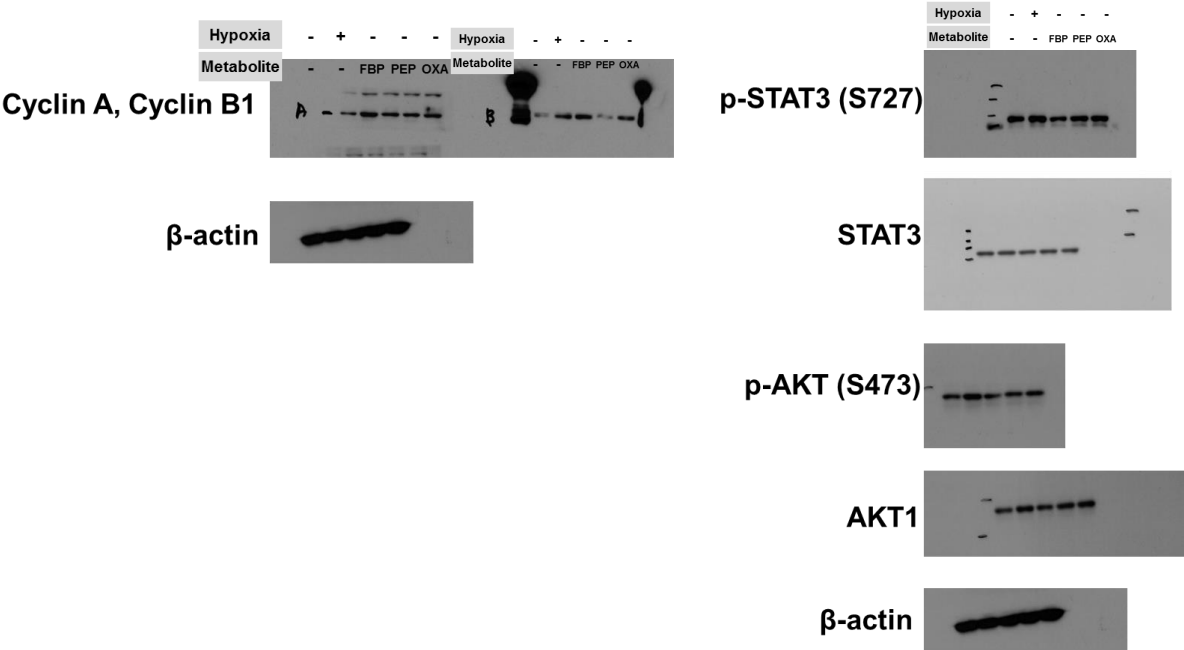

Supplement: 41598_2019_42669_MOESM1_ESM.pdf [file 41598_2019_42669_MOESM1_ESM.pdf]
